# Supplementary material
Source: PubMed Central journal article supplement (PMC4761495)
Supplement: NIHMS750398-supplement-1.pdf [file NIHMS750398-supplement-1.pdf]

**Table S1. Clinicalpathological Features of the NSCLC Patients**

|                       | All patients<br>(n=43) | Patients used<br>for MDSC<br>analysis (n=23) | Patients<br>(decreased<br>arginase cohort,<br>n=15) | Patient (cohort<br>with no<br>difference in<br>arginase, n=20) |
|-----------------------|------------------------|----------------------------------------------|-----------------------------------------------------|----------------------------------------------------------------|
| <b>Age (range)</b>    | 61.5 (40-82)           | 61.7 (40-82)                                 | 61 (45-80)                                          | 62 (40-82)                                                     |
| <b>Gender</b>         |                        |                                              |                                                     |                                                                |
| Female                | 27                     | 15                                           | 8                                                   | 14                                                             |
| Male                  | 18                     | 8                                            | 7                                                   | 6                                                              |
| <b>Race</b>           |                        |                                              |                                                     |                                                                |
| Black                 | 9                      | 6                                            | 1                                                   | 5                                                              |
| White                 | 34                     | 17                                           | 14                                                  | 15                                                             |
| <b>Tumor grade</b>    |                        |                                              |                                                     |                                                                |
| T1                    | 14                     | 5                                            | 5                                                   | 9                                                              |
| T2                    | 9                      | 2                                            | 2                                                   | 4                                                              |
| T3                    | 1                      | 1                                            | 1                                                   | 1                                                              |
| T4                    | 1                      | 1                                            | 0                                                   | 1                                                              |
| Not Reported<br>(NR)  | 11                     | 14                                           | 7                                                   | 5                                                              |
| <b>Nodal stage</b>    |                        |                                              |                                                     |                                                                |
| N0                    | 20                     | 6                                            | 7                                                   | 10                                                             |
| N1                    | 2                      | 1                                            | 1                                                   | 3                                                              |
| N2                    | 3                      | 1                                            | 0                                                   | 1                                                              |
| N3                    | 1                      | 1                                            | 0                                                   | 1                                                              |
| NR                    | 11                     | 14                                           | 7                                                   | 5                                                              |
| <b>Clinical stage</b> |                        |                                              |                                                     |                                                                |
| 1                     | 12                     | 3                                            | 2                                                   | 5                                                              |
| 2                     | 7                      | 4                                            | 2                                                   | 4                                                              |
| 3a                    | 12                     | 10                                           | 3                                                   | 6                                                              |
| 4                     | 1                      | 1                                            | 1                                                   | 0                                                              |
| NR                    | 7                      | 5                                            | 5                                                   | 5                                                              |

**Table S2. List of Primer Sequences**

| Genes                                   | Primer sequences                                                                     |
|-----------------------------------------|--------------------------------------------------------------------------------------|
| Mouse <i>TNF-<math>\alpha</math></i>    | Forward: 5'- AGGCACTCCCCCAAAGATG-3'<br>Reverse: 5'- CCACTTGGTGGTTTGTGAGTG-3'         |
| Mouse <i>IL-12 p35</i>                  | Forward: 5'- CAGAATCACAACCATCAGCAG -3'<br>Reverse: 5'- CACCCTGTTGATGGTCACGAC -3'     |
| Mouse <i>iNOS</i>                       | Forward: 5'- AATAGAGGAACATCTGGCCAGG -3'<br>Reverse: 5'- ATGGCCGACCTGATGTTGC -3'      |
| Mouse <i>IL-6</i>                       | Forward: 5'- CCTCTCTGCAAGAGACTTCCAT-3'<br>Reverse: 5'- ACAGGTCTGTTGGGAGTGGT-3'       |
| Mouse <i>TGF-<math>\beta</math>1</i>    | Forward: 5'- TGCTAATGGTGGACCGCAA -3'<br>Reverse: 5'- CACTGCTTCCCGAATGTCTGA -3'       |
| Mouse <i><math>\beta</math>-MG</i>      | Forward: 5'- CTTTCTGGTGCTTGTCTC -3'<br>Reverse: 5'- TCAGTATGTTCCGGCTTCC -3'          |
| Human <i>B2M</i> (beta-2 microglobulin) | Forward: 5'- GCCTTAGCTG TGCTCGCGCT -3'<br>Reverse: 5'- AGTCGACCAG TCCTTGCTGA -3'     |
| Human <i>Arginase 1</i>                 | Forward: 5'- CAGAGCATGAGCGCCAAGT-3'<br>Reverse: 5'- ATCACACTCTTGTTCTTTAAGTTTCTCAA-3' |

## Supplemental Fig. S1

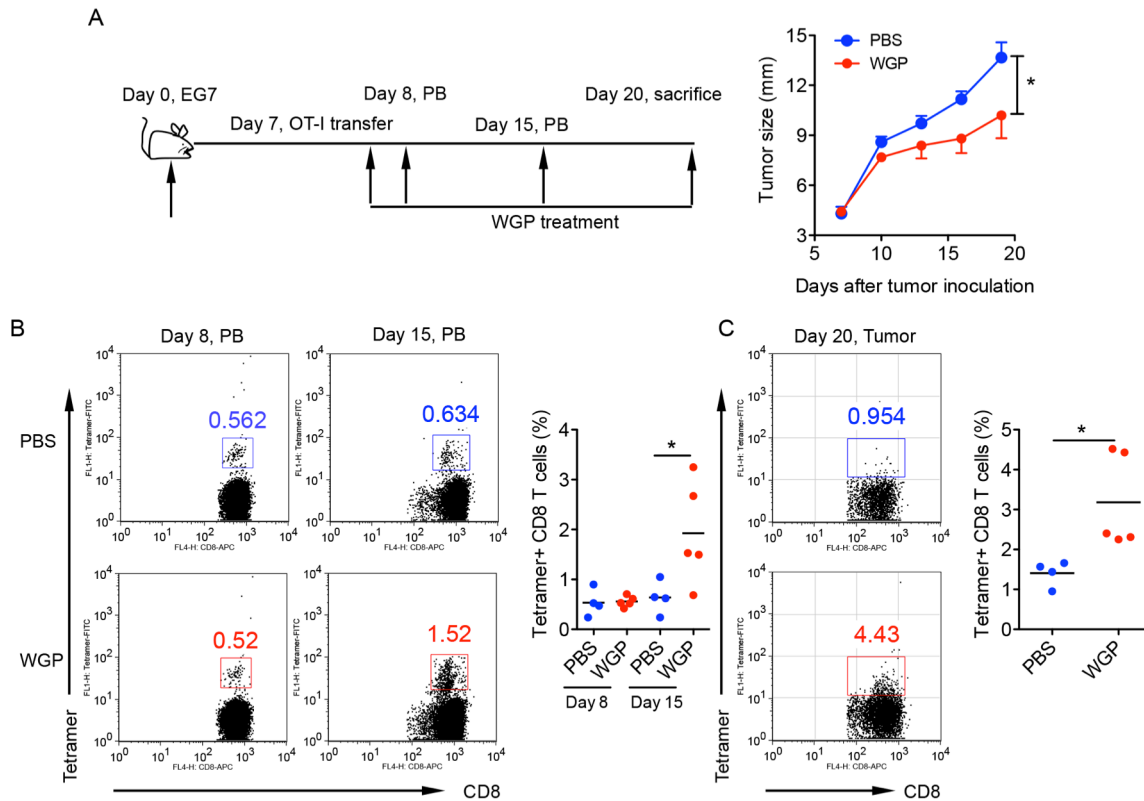

**Fig S1. Particulate  $\beta$ -glucan treatment stimulates enhanced Ag-specific CD8 T cell response.** (A) Schema showing detailed protocol for this experiment. OVA-expressing EG7 tumor cells were used as a model system. WGP treatment for 2 wks showed reduced tumor burden compared to PBS control mice. (B) Peripheral blood (PB) was collected at days 8 and 15 for tetramer staining. Data show that one day after OT-1 transfer, mice treated with or without WGP have comparable tetramer+ CD8 T cells whereas mice treated with WGP have significantly more tetramer+ CD8 T cells after one week WGP treatment. (C) Tumor-bearing mice were treated with or without WGP for 2 wks and tumors were excised and single cell suspension was stained for tetramer. Cells were gated on CD8<sup>+</sup>CD19<sup>-</sup> cells. Data show that WGP  $\beta$ -glucan treatment significantly increases OVA-specific CD8 T cells in tumors. \* $p < 0.05$ .
